# Supplementary material
Source: Springer Nature journal article supplement (https://www.springermedizin.de/resource/supplementary/12885_2012_3728_MOESM2_ESM.pdf/9465954)

**A****MTT**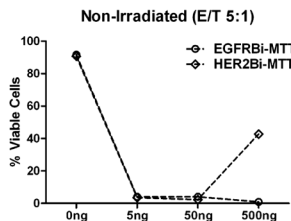**<sup>51</sup>Cr Assay**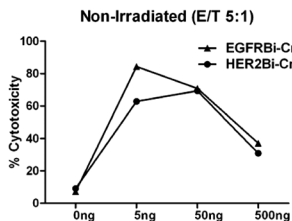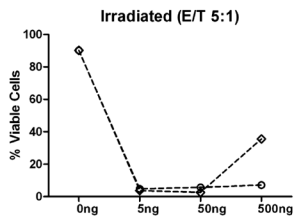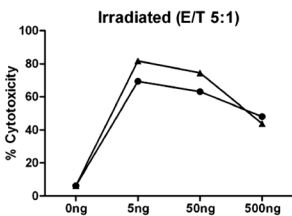**Arming Dose****B**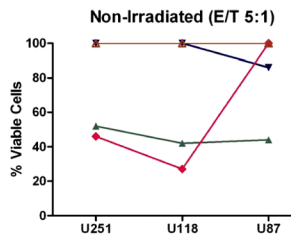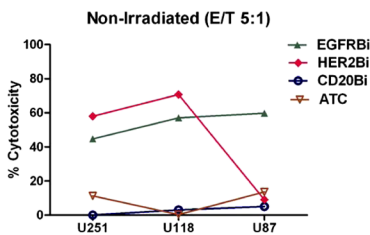**C**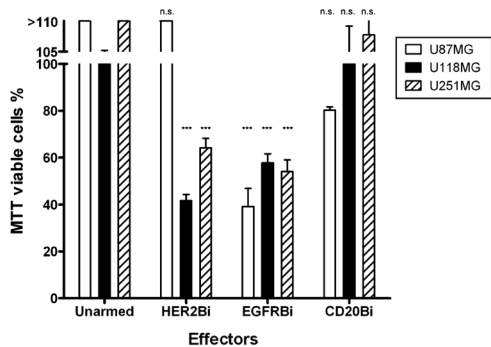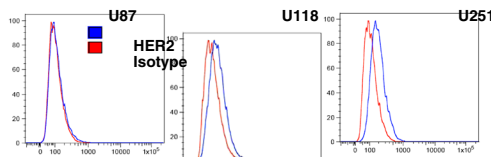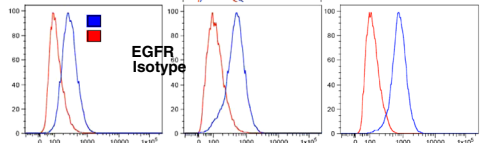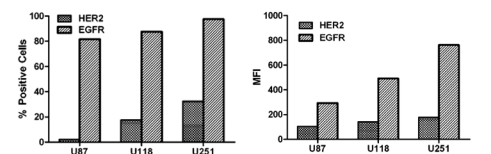

Supplement: MOESM2 [file 9465954]
